# Supplementary material for: Identification of cardiovascular health gene variants related to longevity in a Chinese population
Source: publisher site journal article supplement (doi:10.18632/aging.103396), 2020-09-04
Supplement: Supplementary file [file aging-v12i17-103396-supplementary-material-SD4.pdf]

## SUPPLEMENTARY TABLES

**Supplementary Table 2. Variants associated longevity.**

| SNP       | Chr. | Gene     | Major homo                 | Minor homo                 | Hetero                     | P        | Major homo/Minor homo |       |             | Major homo/Hetero |       |             | Minor homo/Hetero |       |             |
|-----------|------|----------|----------------------------|----------------------------|----------------------------|----------|-----------------------|-------|-------------|-------------------|-------|-------------|-------------------|-------|-------------|
|           |      |          | Longevity/Control          | Longevity/Control          | Longevity/Control          |          | P                     | OR    | 95%CI       | P                 | OR    | 95%CI       | P                 | OR    | 95%CI       |
| rs7586970 | 2    | TFPI     | 3801/6256                  | 44/141                     | 1093/1867                  | 4.09E-04 | 9.60E-05              | 1.947 | 1.385-2.738 | 0.391             | 1.038 | 0.953-1.130 | 3.07E-04          | 0.533 | 0.377-0.754 |
| rs3825807 | 15   | ADAMT S7 | 929/1918                   | 18/47                      | 242/611                    | 0.050    | 0.401                 | 1.265 | 0.73-2.190  | 0.019             | 1.223 | 1.034-1.447 | 0.907             | 0.967 | 0.551-1.698 |
| SNP       | Chr. | Gene     | Centenarians/Nonagenarians | Centenarians/Nonagenarians | Centenarians/Nonagenarians | P        | P                     | OR    | 95%CI       | P                 | OR    | 95%CI       | P                 | OR    | 95%CI       |
| rs7586970 | 2    | TFPI     | 1466/2335                  | 10/34                      | 366/727                    | 0.001    | 0.032                 | 2.135 | 1.051-4.334 | 0.002             | 1.247 | 1.082-1.437 | 0.137             | 0.584 | 0.285-1.196 |
| rs3825807 | 15   | ADAMT S7 | 503/426                    | 5/13                       | 103/139                    | 7.51E-04 | 0.027                 | 3.07  | 1.086-8.681 | 0.001             | 1.593 | 1.198-2.120 | 0.219             | 0.519 | 0.179-1.502 |
| SNP       | Chr. | Gene     | Centenarians/Control       | Centenarians/Control       | Centenarians/Control       | P        | P                     | OR    | 95%CI       | P                 | OR    | 95%CI       | P                 | OR    | 95%CI       |
| rs7586970 | 2    | TFPI     | 1466/6256                  | 10/141                     | 366/1867                   | 2.0E-05  | 1.16E-04              | 3.304 | 1.735-6.291 | 0.005             | 1.195 | 1.054-1.355 | 0.001             | 0.362 | 0.189-0.694 |
| rs3825807 | 15   | ADAMT S7 | 503/1918                   | 5/47                       | 103/611                    | 1.61E-04 | 0.049                 | 2.465 | 0.975-6.230 | 1.59E-04          | 1.556 | 1.235-1.959 | 0.336             | 0.631 | 0.245-1.624 |
| SNP       | Chr. | Gene     | Nonagenarians/Control      | Nonagenarians/Control      | Nonagenarians/Control      | P        | P                     | OR    | 95%CI       | P                 | OR    | 95%CI       | P                 | OR    | 95%CI       |
| rs7586970 | 2    | TFPI     | 2335/6256                  | 34/141                     | 727/1867                   | 0.045    | 0.022                 | 1.548 | 1.061-2.258 | 0.397             | 0.959 | 0.869-1.057 | 0.014             | 0.619 | 0.422-0.909 |
| rs3825807 | 15   | ADAMT S7 | 426/1918                   | 13/47                      | 139/611                    | 0.777    | 0.489                 | 0.803 | .431-1.497  | 0.825             | 0.976 | 0.79-1.207  | 0.550             | 1.216 | 0.64-2.309  |

**Supplementary Table 3. Comparative analysis baseline information about phenotype information between longevity and control.**

|        | Centenarians | Nonagenarians | Longevity  | Control    | P (Cen. vs Non.) | P (Long. vs Con.) | P (Cen. vs Con.) | P (Non. vs Con) |
|--------|--------------|---------------|------------|------------|------------------|-------------------|------------------|-----------------|
| Age    | 102.3±2.19   | 94.0±2.76     | 98.2±4.86  | 69.7±13.97 | 0.000            | 0.000             | 0.000            | 0.000           |
| Gender |              |               |            |            |                  |                   |                  |                 |
| Male   | 355          | 339           | 694        | 1086       |                  |                   |                  |                 |
| Female | 510          | 505           | 1015       | 1480       | 0.713            | 0.265             | 0.509            | 0.270           |
| BMI    | 24.9±9.546   | 23.2±2.557    | 24.0±7.021 | 22.2±2.542 | 0.265            | 0.001             | 0.060            | 0.001           |
| FBG    | 5.1±2.24     | 4.9±2.08      | 5.0±2.17   | 5.0±2.16   | 0.021            | 0.047             | 0.004            | 0.827           |
| TC     | 4.2±1.177    | 4.1±1.16      | 4.1±1.17   | 4.1±1.18   | 0.426            | 0.983             | 0.627            | 0.642           |
| TG     | 1.27±0.99    | 1.2±0.93      | 1.3±0.96   | 1.2±1.00   | 0.569            | 0.011             | 0.019            | 0.099           |
| LDL    | 2.4±0.85     | 2.4±0.87      | 2.4±0.86   | 2.42±0.86  | 0.728            | 0.428             | 0.666            | 0.408           |
| HDL    | 1.28±0.374   | 1.23±0.347    | 1.26±0.361 | 1.26±0.344 | 0.038            | 0.225             | 0.766            | 0.025           |

Cen. stands for Centenarians.

Non. stands for Nonagenarians.

Long. stands for Longevity.

Con. stands for Control.

**Supplementary Table 4. Association of TFPI rs7586970 and ADAMTS7 rs3825807 with phenotype.**

| rs7586970 | Centenarians |    |    | Nonagenarians |    |     | Longevity |    |     | Control |    |     | P( Cen./Non.) | P( Cen./Con.) | P(Non./Con.) | P(Long./Con.)     |
|-----------|--------------|----|----|---------------|----|-----|-----------|----|-----|---------|----|-----|---------------|---------------|--------------|-------------------|
|           | TT           | CC | TC | TT            | CC | TC  | TT        | CC | TC  | TT      | CC | TC  |               |               |              |                   |
| BMI       |              |    |    |               |    |     |           |    |     |         |    |     |               |               |              |                   |
| BMI (+)   | 446          | 4  | 96 | 365           | 10 | 135 | 811       | 14 | 231 | 1208    | 24 | 342 | 4.290E-04     | 0.043         | 0.065        | 0.918             |
| BMI (-)   | 217          | 2  | 49 | 190           | 7  | 61  | 407       | 9  | 110 | 507     | 23 | 158 | 0.065         | 0.014         | 0.878        | 0.116             |
| FBG       |              |    |    |               |    |     |           |    |     |         |    |     |               |               |              |                   |
| FBG (+)   | 412          | 5  | 80 | 377           | 12 | 131 | 789       | 17 | 211 | 1034    | 26 | 287 | 3.440E-04     | 0.020         | 0.135        | 0.930             |
| FBG (-)   | 48           | 0  | 5  | 26            | 0  | 9   | 74        | 0  | 14  | 120     | 2  | 28  | 0.085         | 0.302         | 0.437        | 0.855             |
| TC        |              |    |    |               |    |     |           |    |     |         |    |     |               |               |              |                   |
| TC (+)    | 416          | 5  | 76 | 375           | 12 | 133 | 791       | 17 | 209 | 1054    | 27 | 298 | 5.200E-05     | 0.004         | 0.130        | 0.791             |
| TC (-)    | 44           | 0  | 9  | 28            | 0  | 7   | 72        | 0  | 16  | 100     | 1  | 17  | 0.898         | 0.848         | 0.471        | 0.821             |
| TG        |              |    |    |               |    |     |           |    |     |         |    |     |               |               |              |                   |
| TG (+)    | 376          | 4  | 69 | 324           | 12 | 125 | 700       | 16 | 194 | 951     | 23 | 259 | 1.000E-05     | 0.009         | 0.017        | 0.824             |
| TG (-)    | 84           | 1  | 16 | 79            | 0  | 15  | 163       | 1  | 31  | 203     | 5  | 56  | 0.792         | 0.491         | 0.423        | 0.243             |
| LDL       |              |    |    |               |    |     |           |    |     |         |    |     |               |               |              |                   |
| LDL (+)   | 394          | 4  | 68 | 364           | 12 | 125 | 758       | 16 | 193 | 992     | 26 | 274 | 3.800E-05     | 0.002         | 0.162        | 0.718             |
| LDL (-)   | 67           | 1  | 17 | 39            | 0  | 15  | 106       | 1  | 32  | 163     | 2  | 41  | 0.574         | 1.000         | 0.394        | 0.785             |
| HDL       |              |    |    |               |    |     |           |    |     |         |    |     |               |               |              |                   |
| HDL (+)   | 443          | 5  | 84 | 385           | 12 | 135 | 828       | 17 | 219 | 1107    | 27 | 302 | 0.95E-04      | 0.013         | 0.080        | 0.938             |
| HDL (-)   | 17           | 0  | 1  | 17            | 0  | 5   | 34        | 0  | 6   | 47      | 1  | 13  | 0.537         | 0.435         | 0.904        | 0.834             |
| rs3825807 | Centenarians |    |    | Nonagenarians |    |     | Longevity |    |     | Control |    |     | P(Cen./Non.)  | P(Cen./Con.)  | P(Non./Con.) | P<br>(Long./Con.) |
|           | AA           | GG | AG | AA            | GG | AG  | AA        | GG | AG  | AA      | GG | AG  |               |               |              |                   |
| BMI       |              |    |    |               |    |     |           |    |     |         |    |     |               |               |              |                   |
| BMI (+)   | 241          | 1  | 37 | 155           | 7  | 28  | 396       | 8  | 65  | 413     | 11 | 113 | 0.016         | 0.001         | 0.091        | 0.010             |
| BMI (-)   | 137          | 2  | 20 | 67            | 4  | 31  | 204       | 6  | 51  | 178     | 5  | 57  | 3.100E-04     | 0.011         | 0.239        | 0.518             |
| FBG       |              |    |    |               |    |     |           |    |     |         |    |     |               |               |              |                   |
| FBG (+)   | 345          | 2  | 51 | 180           | 10 | 49  | 525       | 12 | 100 | 519     | 11 | 143 | 8.700E-05     | 4.760E-04     | 0.078        | 0.035             |
| FBG (-)   | 33           | 1  | 4  | 25            | 0  | 4   | 58        | 1  | 8   | 48      | 1  | 22  | 0.891         | 0.028         | 0.207        | 0.010             |
| TC        |              |    |    |               |    |     |           |    |     |         |    |     |               |               |              |                   |
| TC (+)    | 338          | 3  | 50 | 196           | 9  | 50  | 534       | 12 | 100 | 508     | 9  | 154 | 0.002         | 1.520E-04     | 0.063        | 0.002             |
| TC (-)    | 40           | 0  | 5  | 9             | 1  | 3   | 49        | 1  | 8   | 59      | 3  | 11  | 0.069         | 0.694         | 0.381        | 0.859             |
| TG        |              |    |    |               |    |     |           |    |     |         |    |     |               |               |              |                   |
| TG (+)    | 310          | 2  | 44 | 176           | 10 | 45  | 486       | 12 | 89  | 465     | 10 | 140 | 2.720E-04     | 8.900E-05     | 0.049        | 0.003             |
| TG (-)    | 67           | 1  | 11 | 29            | 0  | 8   | 96        | 1  | 19  | 101     | 2  | 25  | 0.524         | 0.633         | 0.924        | 0.712             |
| LDL       |              |    |    |               |    |     |           |    |     |         |    |     |               |               |              |                   |
| LDL (+)   | 316          | 3  | 49 | 183           | 9  | 48  | 499       | 12 | 97  | 474     | 8  | 146 | 0.002         | 4.770E-04     | 0.044        | 0.004             |
| LDL (-)   | 62           | 0  | 6  | 22            | 1  | 5   | 84        | 1  | 11  | 94      | 4  | 19  | 0.124         | 0.264         | 0.909        | 0.347             |
| HDL       |              |    |    |               |    |     |           |    |     |         |    |     |               |               |              |                   |
| HDL (+)   | 252          | 2  | 36 | 143           | 8  | 40  | 395       | 10 | 76  | 383     | 6  | 120 | 8.63E-04      | 4.56E-04      | 0.035        | 0.006             |
| HDL (-)   | 14           | 1  | 1  | 10            | 0  | 0   | 24        | 1  | 1   | 30      | 1  | 7   | 1             | 0.460         | 0.606        | 0.181             |

Cen. stands for Centenarians.

Non. stands for Nonagenarians.

Long. stands for longevity.

Con. stands for control.
