# Supplementary material for: Identification of cardiovascular health gene variants related to longevity in a Chinese population
Source: publisher site journal article supplement (doi:10.18632/aging.103396), 2020-09-04
Supplement: Supplementary file [file aging-v12i17-103396-supplementary-material-SD9.pdf]

## SUPPLEMENTARY TABLE

Supplementary Table 9. Distribution of TFPI rs7586970 genotype in study samples included in meta-analysis.

| Year                 | Country   | Sample                       | N    |     |     | Total |
|----------------------|-----------|------------------------------|------|-----|-----|-------|
|                      |           |                              | TT   | TC  | CC  |       |
| 2007 <sup>[56]</sup> | Australia | 170 cases and 162 controls   | 158  | 145 | 29  | 332   |
| 2007 <sup>[57]</sup> | Australia | 26 cases and 56 controls     | 59   | 21  | 2   | 82    |
| 2008 <sup>[58]</sup> | Denmark   | 57 cases and 103 controls    | 86   | 61  | 13  | 160   |
| 2009 <sup>[59]</sup> | Japan     | 175 cases and 1684 controls  | 1574 | 276 | 9   | 1859  |
| 2010 <sup>[60]</sup> | Norway    | 138 cases and 409 controls   | 267  | 280 | 0   | 547   |
| 2017 <sup>[61]</sup> | China     | 1271 cases and 1287 controls | 2159 | 146 | 253 | 2558  |
